# Supplementary material for: Control of Silver Coating on Raman Label Incorporated Gold Nanoparticles Assembled Silica Nanoparticles
Source: Int J Mol Sci. 2019 Mar 13;20(6):1258. doi: 10.3390/ijms20061258 (PMC6471565; doi:10.3390/ijms20061258)
Supplement: Supplementary file 1 [file ijms-20-01258-s001.pdf]

# Control of Silver Coating on a Raman Labeling Chemical Incorporated Gold Nanoparticles Assembled Silica Nanoparticle

Supplementary Materials:

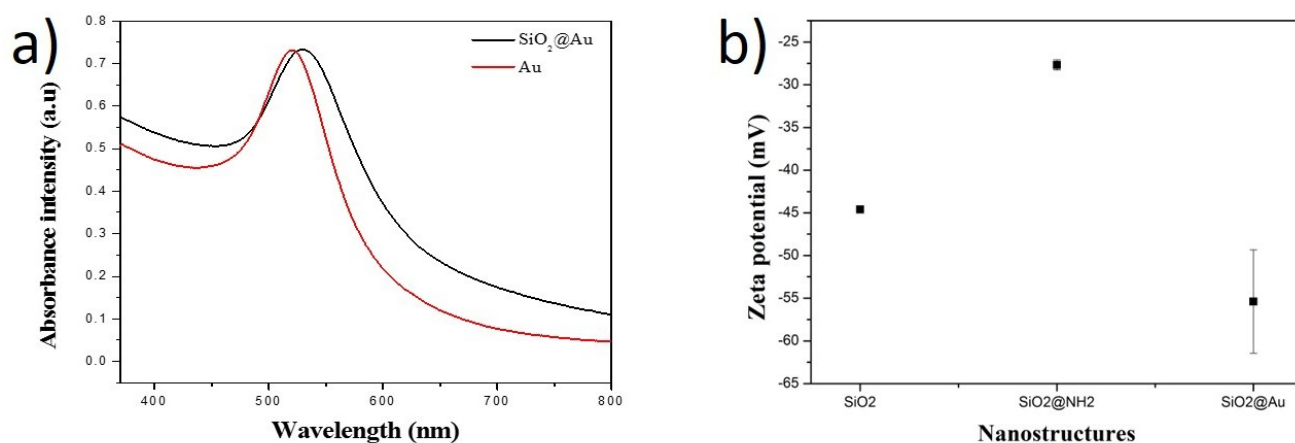

**Figure S1.** (a) UV-Vis of Au and SiO<sub>2</sub>@Au and (b) zeta potential of silica nanoparticles (SiO<sub>2</sub>), 3-aminopropyltriethoxysilane (APTS) coated silica nanoparticles (SiO<sub>2</sub>@NH<sub>2</sub>) and gold embedded silica nanoparticles (SiO<sub>2</sub>@Au).

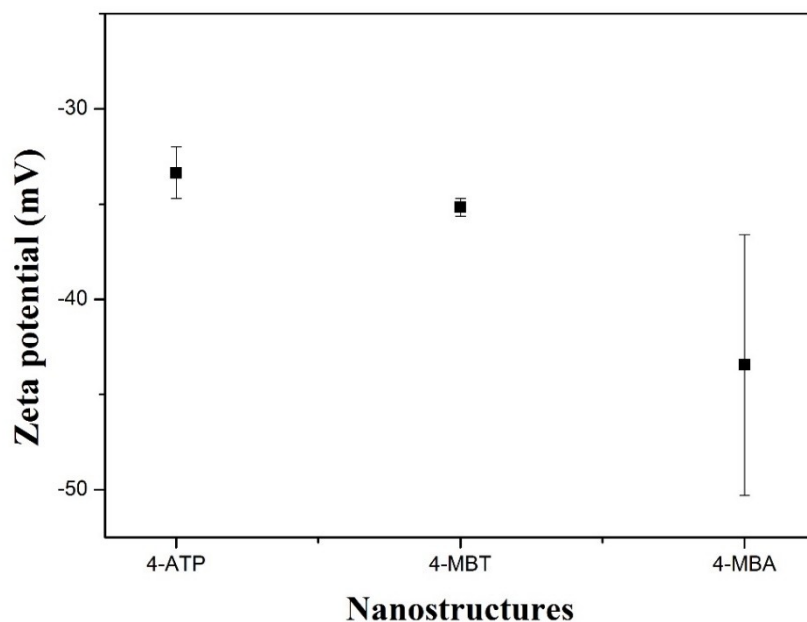

**Figure S2.** Zeta potential of SiO<sub>2</sub>@Au, SiO<sub>2</sub>@Au@4-ATP, SiO<sub>2</sub>@Au@4-MBT and SiO<sub>2</sub>@Au@4-MBA.

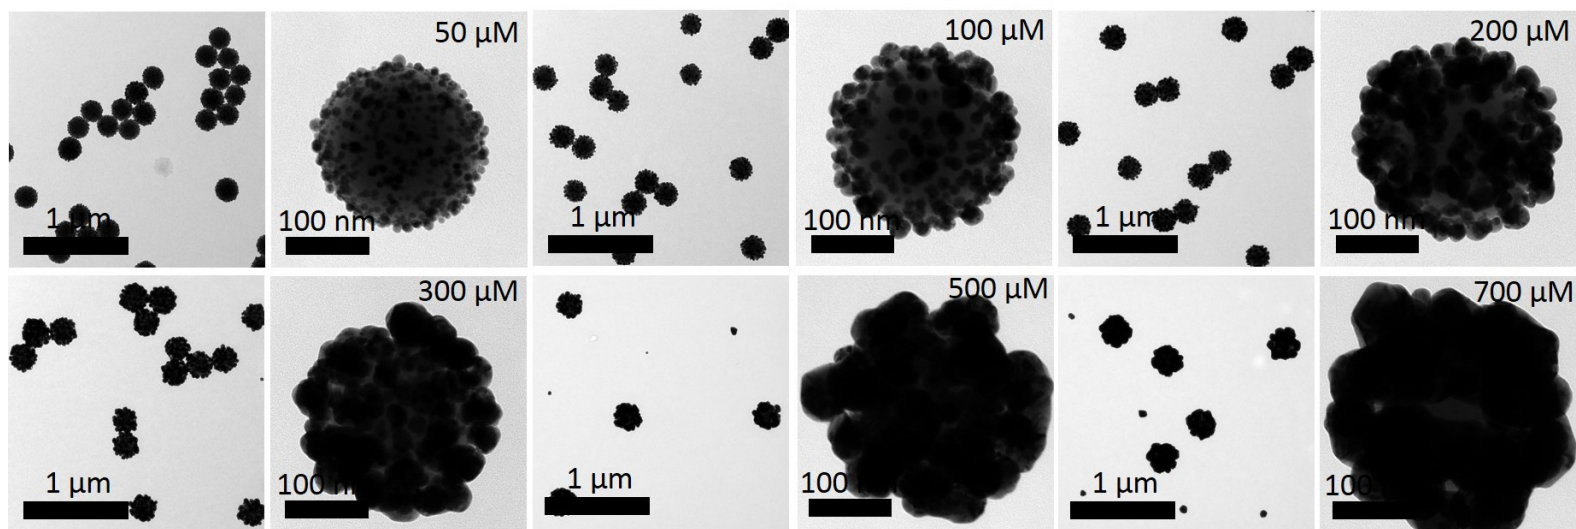

**Figure S3.** Transmission electron microscopy (TEM) images of  $\text{SiO}_2\text{@Au-4-MBA@Ag}$  nanoparticles coated with different concentrations of  $\text{AgNO}_3$  in water. Concentration of 4-MBA was 1 mM.

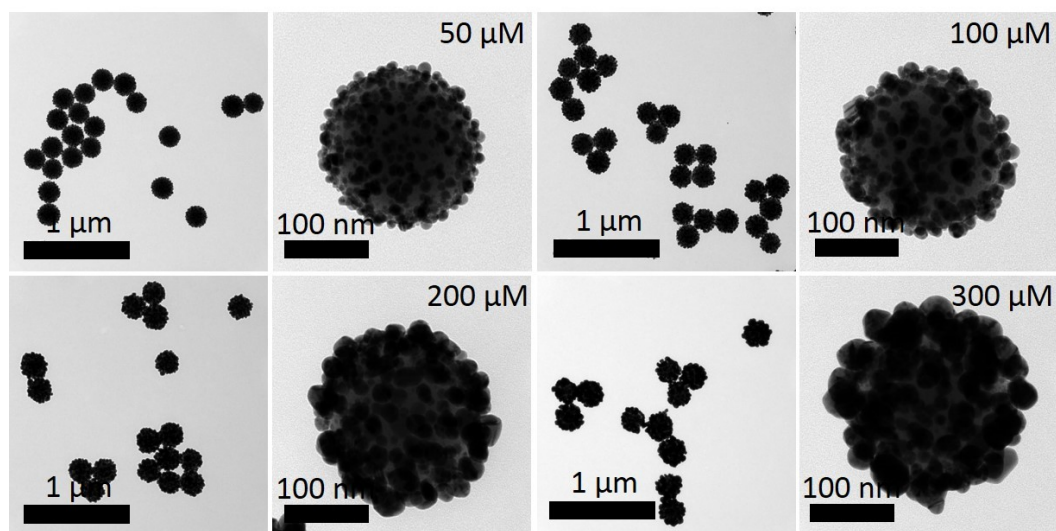

**Figure S4.** TEM images of  $\text{SiO}_2\text{@Au@4-ATP@Ag}$  nanoparticles coated with different concentrations of  $\text{AgNO}_3$ . Concentration of 4-ATP was 1 mM.

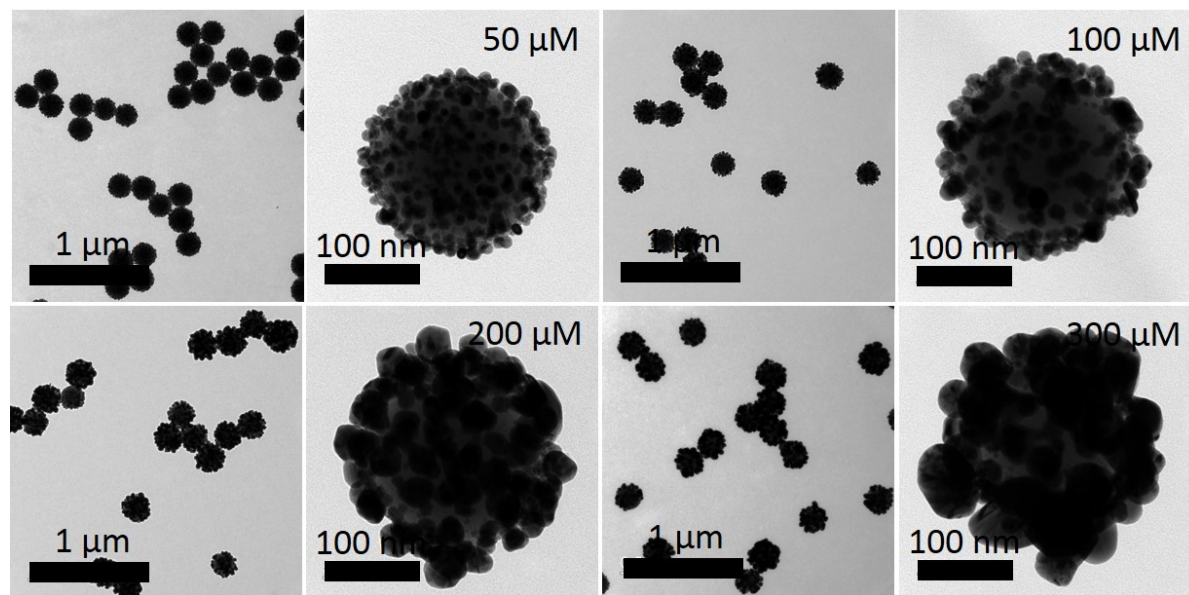

**Figure S5.** TEM images of SiO<sub>2</sub>@Au@4-MBT@Ag nanoparticles coated with different concentrations of AgNO<sub>3</sub>. Concentration of 4-MBT was 1 mM.

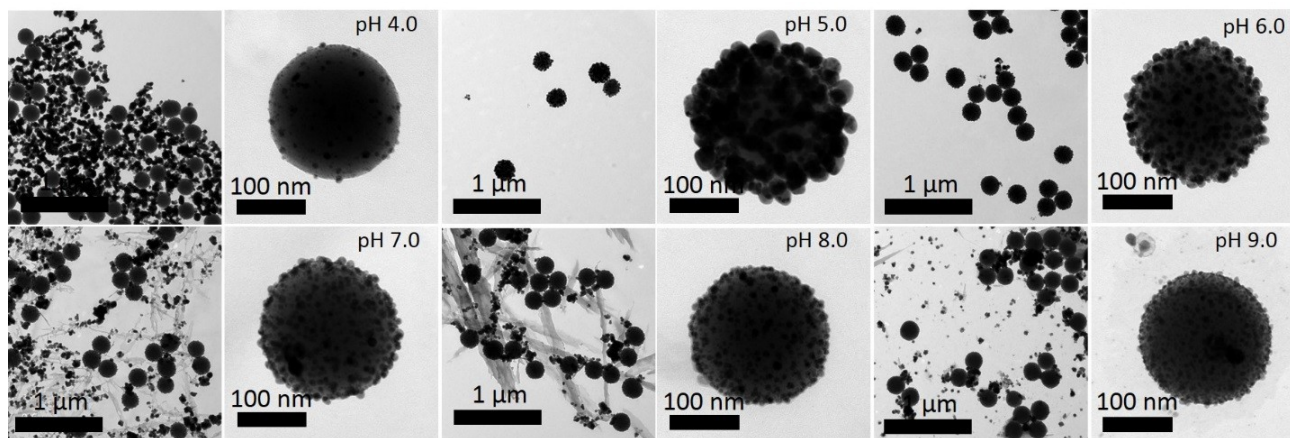

**Figure S6.** TEM images of SiO<sub>2</sub>@Au@4-MBT@Ag nanoparticles coated at different pH. Concentration of 4-MBT was 1 mM.

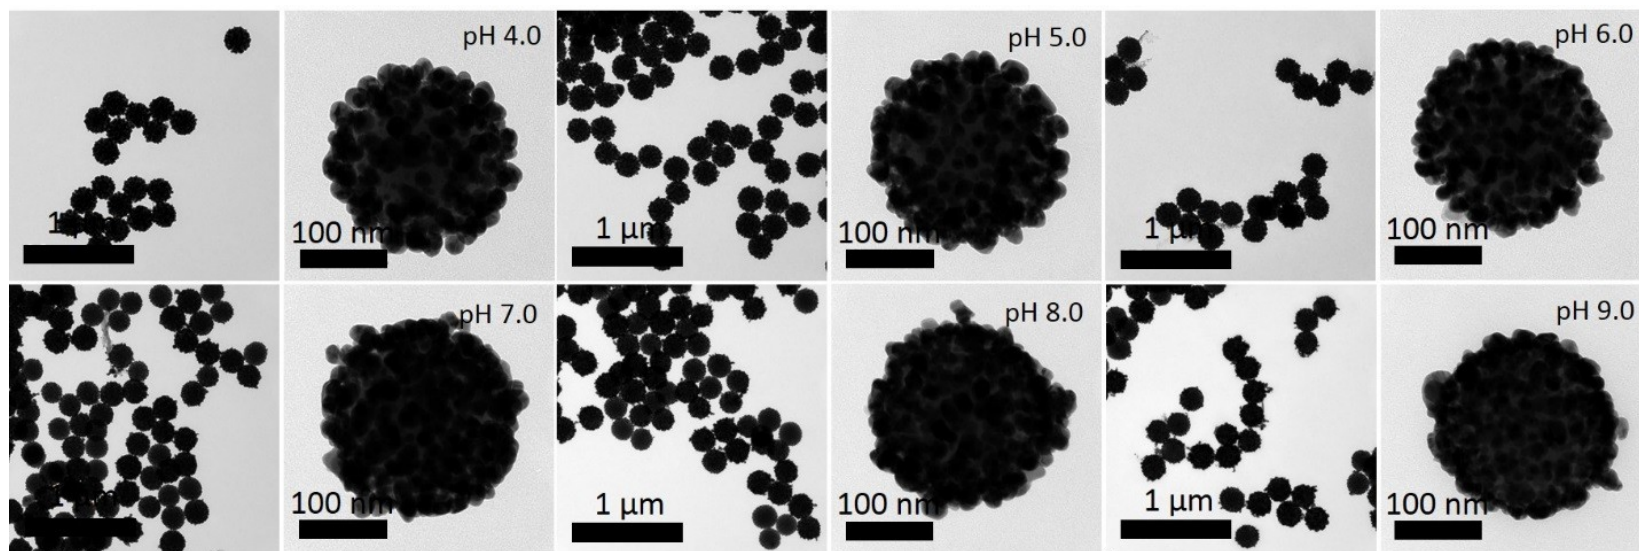

**Figure S7.** TEM images of SiO<sub>2</sub>@Au@4-ATP@Ag nanoparticles coated at different pH. Concentration of 4-ATP was 1 mM.

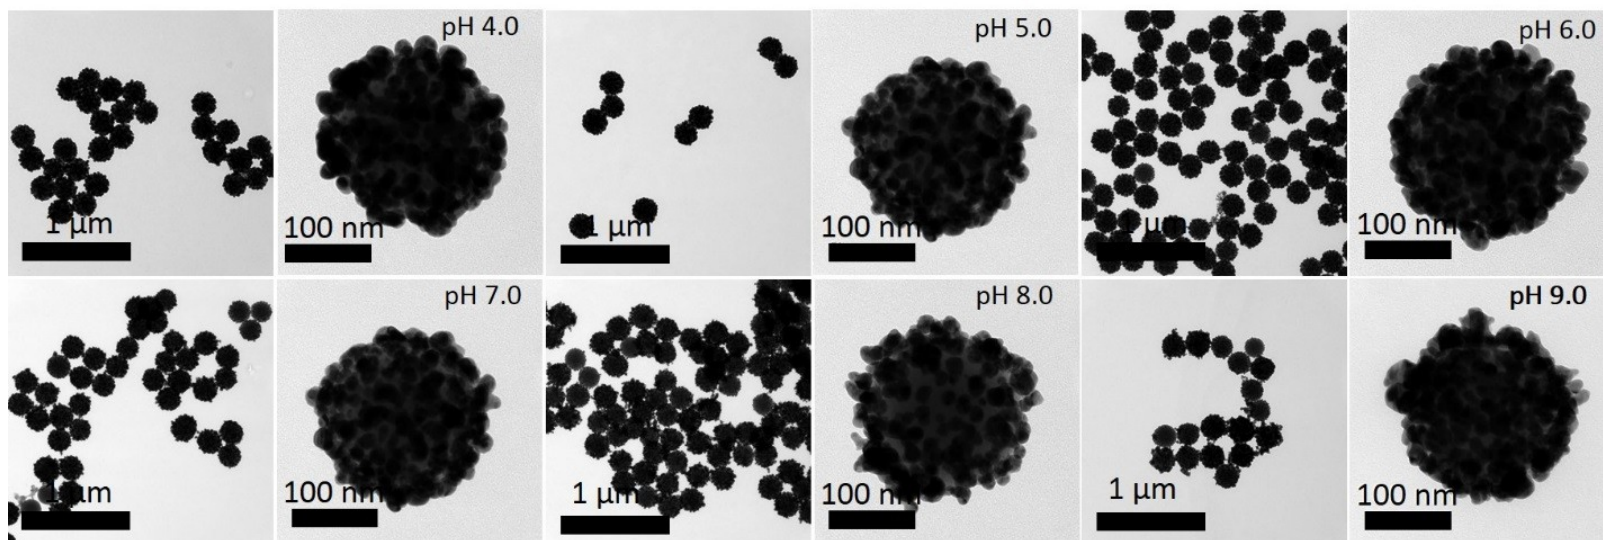

**Figure S8.** TEM images of SiO<sub>2</sub>@Au@4-MBA@Ag nanoparticles coated at different pH. Concentration of 4-MBA was 1 mM.
